# Supplementary material for: Facile syntheses, structures and photocatalytic properties of 3D iodoargentate frameworks derived from TM-flexible-amino-ligand templates
Source: Royal Society of Chemistry journal article supplement (doi:10.1039/d4ce00247d), 2024-01-01
Supplement: d4ce00247d1.pdf [file d4ce00247d1.pdf]

## Electronic Supplementary Information

Facile syntheses, structures and photocatalytic properties of 3-D iodoargentate frameworks derived from TM-flexible-amino-ligand templates

Yan Gao, Xiao Yang, Taohong Ren, Dingxian Jia\*

*College of Chemistry, Chemical Engineering and Materials Science, Soochow*

*University, Suzhou 215123, People's Republic of China.*

### Table of Contents

|                                                                                                                                                                                                                                                                                                            |    |
|------------------------------------------------------------------------------------------------------------------------------------------------------------------------------------------------------------------------------------------------------------------------------------------------------------|----|
| Table S1. Crystallographic and refinement data of <b>1-3</b> . .....                                                                                                                                                                                                                                       | 3  |
| Table S2. Selected Bond Lengths (Å) and angles (°) for <b>1</b> . .....                                                                                                                                                                                                                                    | 3  |
| Table S3. Selected Bond Lengths (Å) and angles (°) for <b>2</b> . .....                                                                                                                                                                                                                                    | 4  |
| Table S4. Selected Bond Lengths (Å) and angles (°) for <b>3</b> . .....                                                                                                                                                                                                                                    | 4  |
| Table S5. Selected H···A distances(Å) and D–H···A angles (°) for <b>1-3</b> . .....                                                                                                                                                                                                                        | 4  |
| Table S6. Summary of Catalytic Activities in Photodegradation of Organic Dyes for Some Iodoargentate Hybrids. ....                                                                                                                                                                                         | 5  |
| Fig. S1 IR spectrum of compound <b>1</b> . .....                                                                                                                                                                                                                                                           | 7  |
| Fig. S2 IR spectrum of compound <b>2</b> . .....                                                                                                                                                                                                                                                           | 7  |
| Fig. S3 IR spectrum of compound <b>3</b> . .....                                                                                                                                                                                                                                                           | 7  |
| Fig. S4 Simulated and experimental powder XRD patterns of compound <b>1</b> (a), <b>2</b> (b) and <b>3</b> (c). ....                                                                                                                                                                                       | 8  |
| Fig. S5 Packing diagrams of <b>1</b> viewed along the <i>a</i> axis (a), <i>b</i> axis (b) and <i>c</i> axis (c) , showing cross-section size of the channels. [Co(en) <sub>3</sub> ] <sup>2+</sup> cations are omitted for clarity. ....                                                                  | 8  |
| Fig. S6 A view of N–H···I and N–H···I H-bonding interaction between [Co(en) <sub>3</sub> ] <sup>2+</sup> and α-[Ag <sub>2</sub> I <sub>4</sub> ] <sub>n</sub> <sup>2n-</sup> framework in <b>1</b> . .....                                                                                                 | 9  |
| Fig. S7 Packing diagrams of <b>3</b> viewed along the <i>a</i> axis (a), <i>b</i> axis (b) and <i>c</i> axis (c), showing cross-section size of the channels. [Co(dien) <sub>2</sub> ] <sup>2+</sup> cations are omitted for clarity. ....                                                                 | 10 |
| Fig. S8 A packing diagram of <b>3</b> viewed along the <i>c</i> axis, showing N–H···I H-bonding interactions between [Co(dien) <sub>2</sub> ] <sup>2+</sup> cation and β-[Ag <sub>2</sub> I <sub>4</sub> ] <sub>n</sub> <sup>2n-</sup> framework. H <sub>2</sub> O molecules are omitted for clarity. .... | 10 |
| Fig. S9 Time dependent absorption spectra of CV solutions with photodegradation over compounds <b>1</b> (a), <b>2</b> (b) and <b>3</b> (c). .....                                                                                                                                                          | 11 |
| Fig. S10. Simulated PXRD patterns and experimental PXRD patterns after photocatalysis for compounds <b>1</b> (a), <b>2</b> (b) and <b>3</b> (c) .....                                                                                                                                                      | 11 |

|                                                                                                                                                                                               |    |
|-----------------------------------------------------------------------------------------------------------------------------------------------------------------------------------------------|----|
| Fig. S11 Time dependent absorption spectra of CV solutions with photodegradation catalyzed by compound <b>2</b> in cycle 1 (a), cycle 2 (b) and cycle 3 (c). .....                            | 12 |
| Fig. S12 Time dependent absorption spectra of CV solution with photodegradation catalyzed by compound <b>1</b> in the presence of radical quenching agents BQ (a), AO (b), and TBA (c). ..... | 12 |
| Fig. S13 Time dependent absorption spectra of CV solution with photodegradation catalyzed by compound <b>2</b> in the presence of radical quenching agents BQ (a), AO (b), and TBA (c). ..... | 13 |
| Fig. S14 Time dependent absorption spectra of CV solution with photodegradation catalyzed by compound <b>3</b> in the presence of radical quenching agents BQ (a), AO (b), and TBA (c). ..... | 13 |
| Fig. S15 Catalytic activities for photodegradation of CV over compound <b>3</b> in the presence of quenchers BQ, TBA and AO. ....                                                             | 14 |
| Fig. S16 Thermal gravimetric curves of compounds <b>1</b> (a), <b>2</b> (b), and <b>3</b> (c). .....                                                                                          | 14 |

**Table S1** Crystallographic and refinement data of **1-3**

|                                                            | <b>1</b>                                                                       | <b>2</b>                                                                       | <b>3</b>                                                                        |
|------------------------------------------------------------|--------------------------------------------------------------------------------|--------------------------------------------------------------------------------|---------------------------------------------------------------------------------|
| Empirical formula                                          | C <sub>6</sub> H <sub>24</sub> N <sub>6</sub> CoAg <sub>2</sub> I <sub>4</sub> | C <sub>6</sub> H <sub>24</sub> N <sub>6</sub> FeAg <sub>2</sub> I <sub>4</sub> | C <sub>8</sub> H <sub>28</sub> N <sub>6</sub> OCoAg <sub>2</sub> I <sub>4</sub> |
| Fw                                                         | 962.58                                                                         | 959.50                                                                         | 1006.63                                                                         |
| Crystal system                                             | hexagonal                                                                      | hexagonal                                                                      | tetragonal                                                                      |
| Space group                                                | <i>P</i> 6 <sub>3</sub> 22                                                     | <i>P</i> 6 <sub>3</sub> 22                                                     | <i>I</i> 4 <sub>1</sub> /amd                                                    |
| <i>a</i> / Å                                               | 9.0389(11)                                                                     | 9.0851(11)                                                                     | 21.681(4)                                                                       |
| <i>b</i> / Å                                               | 9.0389(11)                                                                     | 9.0851(11)                                                                     | 21.681(4)                                                                       |
| <i>c</i> / Å                                               | 14.437(3)                                                                      | 14.411(3)                                                                      | 9.2216(19)                                                                      |
| $\alpha$ / °                                               | 90                                                                             | 90                                                                             | 90                                                                              |
| $\beta$ / °                                                | 90                                                                             | 90                                                                             | 90                                                                              |
| $\gamma$ / °                                               | 120                                                                            | 120                                                                            | 90                                                                              |
| <i>V</i> / Å <sup>3</sup>                                  | 1021.5(3)                                                                      | 1030.1(3)                                                                      | 4334.6(19)                                                                      |
| <i>Z</i>                                                   | 2                                                                              | 2                                                                              | 4                                                                               |
| <i>T</i> / K                                               | 293(2)                                                                         | 293(2)                                                                         | 293(2)                                                                          |
| D <sub>c</sub> /Mg·m <sup>-3</sup>                         | 3.130                                                                          | 3.093                                                                          | 1.543                                                                           |
| <i>F</i> (000)                                             | 870                                                                            | 868                                                                            | 1836                                                                            |
| 2 $\theta$ (max) / °                                       | 50.70                                                                          | 50.70                                                                          | 50.70                                                                           |
| Measured reflections                                       | 9919                                                                           | 2488                                                                           | 19638                                                                           |
| Unique reflections                                         | 634                                                                            | 633                                                                            | 1056                                                                            |
| <i>R</i> <sub>int</sub>                                    | 0.0413                                                                         | 0.0308                                                                         | 0.0949                                                                          |
| No. of parameters                                          | 33                                                                             | 37                                                                             | 35                                                                              |
| <i>R</i> <sub>1</sub> [ <i>I</i> >2 $\sigma$ ( <i>I</i> )] | 0.0240                                                                         | 0.0235                                                                         | 0.0430                                                                          |
| <i>wR</i> <sub>2</sub> (all data)                          | 0.0551                                                                         | 0.0501                                                                         | 0.1053                                                                          |
| Goodness of fit                                            | 1.273                                                                          | 1.122                                                                          | 1.085                                                                           |

**Table S2.** Selected Bond Lengths (Å) and angles (°) for **1**

|                     |             |                     |            |
|---------------------|-------------|---------------------|------------|
| Ag(1)–I(1)          | 2.8574(5)   | Ag(1)–I(2)          | 2.8818(13) |
| Co(1)–N(1)          | 2.169(6)    |                     |            |
| I(1)–Ag(1)–I(1)#2   | 113.752(19) | I(1)–Ag(1)–I(2)     | 104.75(2)  |
| Ag(1)–I(1)#3–Ag(1)  | 142.89(3)   | Ag(1)–I(2)–Ag(1)    | 180.0      |
| N(1)#6–Co(1)–N(1)   | 92.7(4)     | N(1)#5–Co(1)–N(1)#4 | 93.7(2)    |
| N(1)#5–Co(1)–N(1)#6 | 171.6(4)    | N(1)#1–Co(1)–N(1)#6 | 80.5(4)    |

Symmetry transformations used to generate equivalent atoms: #1)  $-y+1, -x+1, -z+1/2$ ; #2)  $-y+1, x-y+1, z$ ; #3)  $-x+y, -x+1, z$ ; #4)  $-y+1, x-y-1, z$ ; #5)  $x, x-y-1, -z+1/2$ ; #6)  $-x+y+2, y, -z+1/2$ .

**Table S3.** Selected Bond Lengths (Å) and angles (°) for **2**

|                    |             |                     |            |
|--------------------|-------------|---------------------|------------|
| Ag(1)–I(1)         | 2.8592(5)   | Ag(1)–I(2)          | 2.8758(12) |
| Fe(1)–N(1)         | 2.214(6)    |                     |            |
|                    |             |                     |            |
| I(1)#1–Ag(1)–I(1)  | 113.767(16) | I(1)–Ag(1)–I(2)     | 104.73(2)  |
| Ag(1)–I(2)–Ag(1)#2 | 180.0       | Ag(1)#3–I(1)–Ag(1)  | 144.30(2)  |
| N(1)–Fe(1)–N(1)#4  | 94.0(2)     | N(1)–Fe(1)–N(1)#5   | 93.5(3)    |
| N(1)–Fe(1)–N(1)#6  | 170.2(4)    | N(1)#4–Fe(1)–N(1)#6 | 79.3(3)    |

Symmetry transformations used to generate equivalent atoms: #1)  $-y+1, x-y, z$ ; #2)  $-y+1, -x+1, z-1/2$ ; #3)  $x-y, -y+1, -z+2$ ; #4)  $-y+1, x-y-1, z$ ; #5)  $-x+y+2, y, -z+1/2$ ; #6)  $x, x-y-1, -z+1/2$ .

**Table S4.** Selected Bond Lengths (Å) and angles (°) for **3**

|                     |            |                     |           |
|---------------------|------------|---------------------|-----------|
| Ag(1)–I(1)          | 2.899(3)   | Ag(1)–I(2)#1        | 2.841(4)  |
| Co(1)–N(1)          | 2.06(3)    | Co(1)–N(2)#4        | 2.00(6)   |
| I(1)–Ag(1)–I(1)     | 101.06(16) | I(2)#3–Ag(1)–I(1)#1 | 113.15(7) |
| I(2)#1–Ag(1)–I(2)#1 | 108.53(16) | I(2)#3–Ag(1)–I(1)#3 | 110.45(8) |
| Ag(1)–I(1)–Ag(1)#2  | 177.89(16) | Ag(1)#1–I(2)–Ag(1)  | 71.47(16) |
| N(1)#6–Co(1)–N(1)#4 | 91.0(3)    | N(2)–Co(1)–N(1)#6   | 82.4(12)  |
| N(1)#5–Co(1)–N(1)#4 | 165(2)     | N(2)–Co(1)–N(1)#5   | 97.6(12)  |

Symmetry transformations used to generate equivalent atoms: #1)  $-x+1, -y+1, -z+1$ ; #3)  $-y+1, x-y+1, z$ ; #4)  $-y+3/4, x+1/4, z-1/4$ ; #5)  $-y+1, -x+1, -z+1/2$ ; #6)  $x-y, -y+1, -z$ ; #7)  $-y+5/4, x+1/4, -z+3/4$ .

**Table S5.** Selected H···A distances (Å) and D–H···A angles (°) for **1-3**

| D–H···A             | d(H···A) | d(D···A) | <(DHA) |
|---------------------|----------|----------|--------|
| <b>1</b>            |          |          |        |
| N(1)–H(1B)···I(1)#1 | 3.041    | 3.842    | 150.71 |
| C(1)–H(1D)···I(1)#2 | 3.154    | 3.895    | 134.33 |
| <b>2</b>            |          |          |        |
| N(1)–H(1B)···I(1)#1 | 3.040    | 3.842    | 150.93 |
| C(1)–H(1D)···I(1)#2 | 3.184    | 3.927    | 134.72 |
| <b>3</b>            |          |          |        |
| N(1)–H(1A)···I(1)#1 | 2.993    | 3.803    | 152.17 |
| N(1)–H(1B)···I(1)#2 | 2.993    | 3.803    | 152.17 |

Symmetry transformations used to generate equivalent atoms: For **1**: #1)  $-y+1, x-y, z$ ; #2)  $x+1, y, z$ . For **2**: #1)  $-y+1, x-y, z-1$ ; #2)  $x-y+1, x, z-1/2$ . For **3**: #1)  $-x+1, -y+1, -z+1$ ; #2)  $y+1/4, -x+5/4, z-1/4$ .

**Table S6.** Summary of Catalytic Activities in Photodegradation of Organic Dyes for Some Iodoargentate Hybrids with Different Cations

| Compound                                                                                                                            | organic dyes     | light source | irradiation time | band gaps of hybrids | degradation ratio | Ref. |
|-------------------------------------------------------------------------------------------------------------------------------------|------------------|--------------|------------------|----------------------|-------------------|------|
| (Et <sub>2</sub> mbt)[Ag <sub>2</sub> I <sub>3</sub> ]                                                                              | <sup>d</sup> MO  | UV light     | 60 min           | 2.95 eV              | 94%               | 1    |
| <sup>a</sup> {(Hmbt)[AgI]} <sub>n</sub>                                                                                             | MO               | UV light     | 80 min           | 2.78 eV              | 85%               |      |
| <sup>b</sup> [(Hpy)(Ag <sub>2</sub> I <sub>3</sub> ) <sub>n</sub> ]                                                                 | <sup>e</sup> RhB | Hg lamp      | 180 min          | 2.93 eV              | 89%               | 2    |
| {[(Hpy) <sub>2</sub> ·dmf][Ag <sub>6</sub> I <sub>8</sub> ]} <sub>n</sub>                                                           | RhB              | Hg lamp      | 180 min          | 3.05 eV              | 93%               |      |
| {[(Hpy) <sub>2</sub> ·H <sub>2</sub> O][Ag <sub>3</sub> I <sub>5</sub> ]} <sub>n</sub>                                              | RhB              | Hg lamp      | 180 min          | 2.99 eV              | 83%               |      |
| [(Hpy)(Ag <sub>5</sub> I <sub>6</sub> ) <sub>n</sub> ]                                                                              | RhB              | Hg lamp      | 180 min          | 2.71 eV              | 98%               |      |
| Fe(2,2'-bipy) <sub>3</sub> Ag <sub>3</sub> I <sub>5</sub>                                                                           | <sup>f</sup> CV  | Xe lamp      | 60 min           | 1.87 eV              | 93%               | 3    |
| Ni(2,2'-bipy) <sub>3</sub> Ag <sub>3</sub> I <sub>5</sub>                                                                           | CV               | Xe lamp      | 60 min           | 2.01 eV              | 89%               |      |
| Zn(2,2'-bipy) <sub>3</sub> Ag <sub>3</sub> I <sub>5</sub>                                                                           | CV               | Xe lamp      | 60 min           | 2.61 eV              | 56%               |      |
| Mn(2,2'-bipy) <sub>3</sub> Ag <sub>3</sub> I <sub>5</sub>                                                                           | CV               | Xe lamp      | 60 min           | 2.28 eV              | 100%              |      |
| [(Me) <sub>2</sub> -2,2'-bipy] <sub>2</sub> Ag <sub>7</sub> I <sub>11</sub>                                                         | CV               | Xe lamp      | 50 min           | 2.03 eV              | 100%              | 4    |
|                                                                                                                                     | RhB              | Xe lamp      | 60 min           | 2.03 eV              | 100%              |      |
| [Zn(2, 2'-bipy) <sub>3</sub> ]Ag <sub>5</sub> I <sub>7</sub>                                                                        | CV               | UV light     | 60 min           | 2.58 eV              | 98%               | 5    |
| [Ni(2, 2'-bipy) <sub>3</sub> ]Ag <sub>5</sub> I <sub>7</sub>                                                                        | CV               | UV light     | 60 min           | 2.10 eV              | 98%               |      |
| [Co(2, 2'-bipy) <sub>3</sub> ]Ag <sub>5</sub> I <sub>7</sub>                                                                        | CV               | UV light     | 60 min           | 1.94 eV              | 98%               |      |
| <sup>c</sup> K <sub>x</sub> [TM(2,2'-bipy) <sub>3</sub> ] <sub>2</sub> Ag <sub>6</sub> I <sub>11</sub><br>(TM = Mn, Fe, Co, Ni, Zn) | CV               | Xe lamp      | 50-60min         | 1.66 -2.08 eV        | 56-100%           | 6    |
| [(Ni(2,2'-bipy) <sub>3</sub> ][H-2,2-bipy]Ag <sub>3</sub> I <sub>6</sub>                                                            | CV               | Xe lamp      | 60 min           | 2.75 eV              | 71%               |      |
| <sup>c</sup> K <sub>x</sub> [Mn(2,2'-bipy) <sub>3</sub> ] <sub>2</sub> Ag <sub>6</sub> I <sub>11</sub>                              | RhB              | Xe lamp      | 30min            | 2.01 eV              | 100%              |      |
| <sup>c</sup> K <sub>x</sub> [TM(2,2'-bipy) <sub>3</sub> ] <sub>2</sub> Ag <sub>6</sub> I <sub>11</sub><br>(TM = Fe, Co, Ni, Zn)     | RhB              | Xe lamp      | 180 min          | 1.66-2.08 eV         | 88-100%           |      |
| [(Ni(2,2'-bipy) <sub>3</sub> ][H-2,2-bipy]Ag <sub>3</sub> I <sub>6</sub>                                                            | RhB              | Xe lamp      | 180 min          | 2.75 eV              | 100%              | 7    |
| [Co(phen) <sub>3</sub> ] <sub>2</sub> Ag <sub>3</sub> I <sub>5</sub> ·2CH <sub>3</sub> CN                                           | RhB              | Hg lamp      | 180 min          | 3.04 eV              | 51%               |      |
| [Co(phen) <sub>3</sub> ] <sub>2</sub> Ag <sub>11</sub> I <sub>15</sub> ·H <sub>2</sub> O                                            | RhB              | Hg lamp      | 180 min          | 2.84 eV              | 62%               |      |
| [Cu(phen) <sub>3</sub> ] <sub>2</sub> Ag <sub>11</sub> I <sub>15</sub> ·H <sub>2</sub> O                                            | RhB              | Hg lamp      | 180 min          | 2.87 eV              | 80%               |      |
| [Co(phen) <sub>3</sub> ] <sub>2</sub> Ag <sub>13</sub> I <sub>17</sub>                                                              | RhB              | Hg lamp      | 180 min          | 2.89 eV              | 40%               |      |
| [Cd(phen) <sub>3</sub> ] <sub>2</sub> Ag <sub>13</sub> I <sub>17</sub>                                                              | RhB              | Hg lamp      | 180 min          | 3.19 eV              | 29%               |      |
| [Ni(DMSO) <sub>6</sub> ][Ag <sub>5</sub> I <sub>7</sub> ]                                                                           | <sup>g</sup> MV  | UV light     | 150 min          | 2.73 eV              | 92%               | 8    |
| [V(DMSO) <sub>5</sub> (H <sub>2</sub> O)][Ag <sub>6</sub> I <sub>8</sub> ]                                                          | <sup>h</sup> MB  | UV light     | 60 min           | 2.61 eV              | 100%              |      |
| <sup>i</sup> [Fe(DMSO) <sub>6</sub> ][Ag <sub>6</sub> I <sub>9</sub> ]·DMSO                                                         | MB               | UV light     | 9 h              | 2.28 eV              | 90%               | 9    |
|                                                                                                                                     | MV               | UV light     | 180 min          | 2.28 eV              | 80%               |      |
| [Fe(H <sub>2</sub> O) <sub>6</sub> ][Ag <sub>15</sub> I <sub>18</sub> ]                                                             | MB               | UV light     | 240 min          | 1.92 eV              | 94%               |      |
|                                                                                                                                     | MV               | UV light     | 180 min          | 1.92 eV              | 90%               |      |
| <sup>i</sup> [Cd(DMSO) <sub>6</sub> ][Ag <sub>8</sub> I <sub>10</sub> ]                                                             | MB               | UV light     | 9 h              | 2.46 eV              | 91%               |      |
|                                                                                                                                     | MV               | UV light     | 180 min          | 2.46 eV              | 80%               |      |
| <sup>j</sup> (EtPPh <sub>3</sub> )Ag <sub>3</sub> I <sub>4</sub> (Et = ethyl)                                                       | RhB              | Xe lamp      | 160 min          | 3.26 eV              | 80%               | 10   |
| (n-PrPPh <sub>3</sub> )Ag <sub>3</sub> I <sub>4</sub> (n-Pr = n-propyl)                                                             | RhB              | Xe lamp      | 160 min          | 3.37 eV              | 85%               |      |
| (i-PrPPh <sub>3</sub> )Ag <sub>5</sub> I <sub>6</sub> (i-Pr = isopropyl)                                                            | RhB              | Xe lamp      | 160 min          | 2.76 eV              | 89%               |      |
| <sup>k</sup> [Co(2,2'-bipy) <sub>3</sub> ]Ag <sub>3</sub> I <sub>6</sub>                                                            | CV               | Xe lamp      | 120 min          | 2.03 eV              | 100%              | 11   |

|                                                                                                                                                     |     |         |         |         |      |    |
|-----------------------------------------------------------------------------------------------------------------------------------------------------|-----|---------|---------|---------|------|----|
|                                                                                                                                                     | MB  | Xe lamp | 11 h    | 2.03 eV | 100% |    |
|                                                                                                                                                     | RhB | Xe lamp | 120 min | 2.03 eV | 90%  |    |
|                                                                                                                                                     | MO  | Xe lamp | 8 h     | 2.03 eV | 2%   |    |
| [(Me) <sub>2</sub> -2,2'-bipy]Ag <sub>8</sub> I <sub>10</sub><br>(Me = methyl)                                                                      | RhB | Xe lamp | 80 min  | 1.92 eV | 95%  | 12 |
|                                                                                                                                                     | MO  | Xe lamp | 60 min  | 1.92 eV | 100% |    |
| <sup>f</sup> [La(DMA) <sub>8</sub> ]Ag <sub>9</sub> I <sub>12</sub> ·2H <sub>2</sub> O                                                              | CV  | Xe lamp | 210 min | 2.58 eV | 27%  | 13 |
|                                                                                                                                                     | RhB | Xe lamp | 210 min | 2.58 eV | 68%  |    |
| [Pr(DMA) <sub>7</sub> ]Ag <sub>16</sub> I <sub>22</sub>                                                                                             | CV  | Xe lamp | 210 min | 2.77 eV | 80%  |    |
|                                                                                                                                                     | RhB | Xe lamp | 210 min | 2.77 eV | 19%  |    |
| [Sm(DMA) <sub>7</sub> ]Ag <sub>16</sub> I <sub>22</sub>                                                                                             | CV  | Xe lamp | 210 min | 2.74 eV | 87%  |    |
|                                                                                                                                                     | RhB | Xe lamp | 210 min | 2.74 eV | 37%  |    |
| <sup>m</sup> [MBI][Ag <sub>2</sub> I <sub>3</sub> ]                                                                                                 | RhB | Xe lamp | 140 min | 3.46 eV | 60%  | 14 |
| <sup>n</sup> [MDMBI][Ag <sub>2</sub> I <sub>3</sub> ]                                                                                               | RhB | Xe lamp | 140 min | 3.31 eV | 80%  |    |
| <sup>o</sup> [Mn(2,2'-bipy) <sub>2</sub> (DMF) <sub>2</sub> ]Ag <sub>5</sub> I <sub>7</sub>                                                         | CV  | Xe lamp | 6 h     | 2.68 eV | 91%  | 15 |
| [{Cd(2,2'-bipy) <sub>2</sub> } <sub>2</sub> (μ <sub>4</sub> -Ag <sub>2</sub> I <sub>6</sub> )]                                                      | CV  | Xe lamp | 6 h     | 2.84 eV | 28%  |    |
| <sup>p</sup> [{Zn(DMF) <sub>2</sub> (H <sub>2</sub> O) <sub>2</sub> } <sub>2</sub> (4,4'-bipy) <sub>1.5</sub> ]Ag <sub>5</sub> I <sub>7</sub> ·2DMF | CV  | Xe lamp | 6 h     | 2.75 eV | 93%  |    |
| [{Nd(DMSO) <sub>8</sub> } <sub>8</sub> ](Ag <sub>7</sub> I <sub>10</sub> ) <sub>n</sub>                                                             | MB  | Xe lamp | 80 min  | 3.04 eV | 96%  | 16 |
| [{Nd(DMSO) <sub>8</sub> } <sub>8</sub> ](Pb <sub>2</sub> Ag <sub>2</sub> I <sub>9</sub> ) <sub>n</sub>                                              | MB  | Xe lamp | 80 min  | 3.07 eV | 90%  |    |

<sup>a</sup>Hmbt = 2-mercaptobenzothiazole, <sup>b</sup>Hpy<sup>+</sup> = protonated pyridine, <sup>c</sup>x = 0.89–1, <sup>d</sup>MO methyl orange, <sup>e</sup>RhB = rhodamine B, <sup>f</sup>CV = crystal violet, <sup>g</sup>MV = methyl violet, <sup>h</sup>MB = methylene blue, <sup>i</sup>DMSO = dimethyl sulfoxide, <sup>j</sup>PPh<sub>3</sub> = aromatic triphenylphosphine, <sup>k</sup>2,2'-bipy = 2,2'-bipyridine, <sup>l</sup>DMA = N,N-dimethylacetamide, <sup>m</sup>MBI<sup>+</sup> = N,N-dimethylbenzimidazolium, <sup>n</sup>MDMBI<sup>+</sup> = N,N-dimethyl-5,6-dimethylbenzimidazolium, <sup>o</sup>DMF = N,N'-dimethylformamide, <sup>p</sup>4,4'-bipy = 4,4'-bipyridine.

#### [Reference]

- G. N. Liu, K. Li, Q. S. Fan, H. Sun, X. Y. Li, X. N. Han, Y. Li, Z. W. Zhang, and C. Li, *Dalton Trans.* 2016, **45**, 19062–19071.
- T. Yu, J. Shen, Y. Wang and Y. Fu, *Eur. J. Inorg. Chem.*, 2015, 1989–1996.
- X.-W. Lei, C.-Y. Yue, J.-Q. Zhao, Y.-F. Han, Z.-R. Ba, C. Wang, X.-Y. Liu, Y.-P. Gong and X.-Y. Liu, *Eur. J. Inorg. Chem.*, 2015, 4412–4419.
- X.-W. Lei, C.-Y. Yue, L.-J. Feng, Y.-F. Han, R.-R. Meng, J.-T. Yang, H. Ding, C.-S. Gao and C.-Y. Wang, *CrystEngComm.*, 2016, **18**, 427–436.
- X. W. Lei, C. Y. Yue, F. Wu, X. Y. Jiang, and L. N. Chen, *Inorg. Chem. Commun.* 2017, **77**, 64–67.
- X. W. Lei, C. Y. Yue, J. Q. Zhao, Y. F. Han, J. T. Yang, R. R. Meng, C. S. Gao, H. Ding, C. Y. Wang, W. D. Chen, and M. C. Hong, *Inorg. Chem.* 2015, **54**, 10593–10603.
- T. Yu, Y. Fu, Y. Wang, P. Hao, J. Shen and Y. Fu, *CrystEngComm.*, 2015, **17**, 8752–8761.
- Y. Mu, D. Wang, X. D. Meng, J. Pan, S. D. Han, and Z. Z. Xue, *Cryst. Growth Des.* 2020, **20**, 1130–1138.
- Q. Wei, D. Wang, J. Pan, S. D. Han, and G. M. Wang. *Chem. Asian J.*, 2019, **14**, 640–646.
- G. N. Liu, X. Zhang, H. M. Wang, H. Xu, Z. H. Wang, X. L. Meng, Y. N. Dong, R. Y. Zhao, and C. C. Li. *Dalton Trans.*, 2017, **46**, 12474–12486.
- C. Y. Tang, Y. W. Sun, J. B. Liu, Q. F. Xu, C. Y. Zhang. *Dalton Trans.*, 2022, **51**, 16784–16789.
- C. Y. Yue, B. Hu, X. W. Lei, R. Q. Li, F. Q. Mi, H. Gao, Y. Li, F. Wu, C. L. Wang, and N. Lin. *Inorg. Chem.*, 2017, **56**, 10962–10970.
- Y. Gao, N. N. Chen, Y. M. Tian, J. H. Zhang, and D. X. Jia. *Inorg. Chem.*, 2021, **60**, 3761–3772.
- P. F. Hao, Y. Xu, X. Li, J. J. Shen, and Y. L. Fu. *Inorg. Chem. Front.*, 2020, **7**, 3184–3194.
- W. Zheng, Y. Gao, N. N. Chen, B. Wu, D. X. Jia, and S. X. Zhao. *Inorg. Chim. Acta.*, 2020, **510**, 119762.
- J. Y. Lu, J. H. Zhang, X. Yang, D. X. Jia, and S. X. Zhao. *Inorg. Chim. Acta.*, 2022, **537**, 120962.

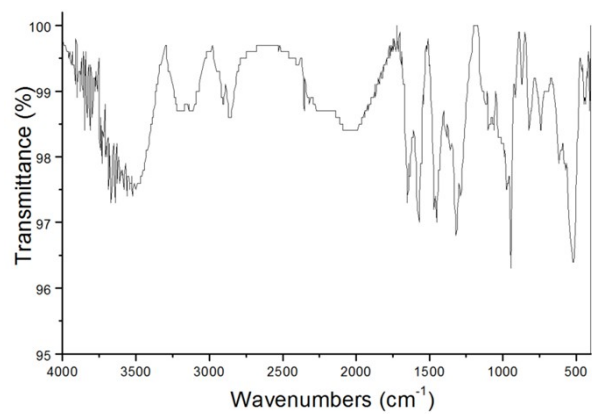

**Fig. S1** IR spectrum of compound **1**.

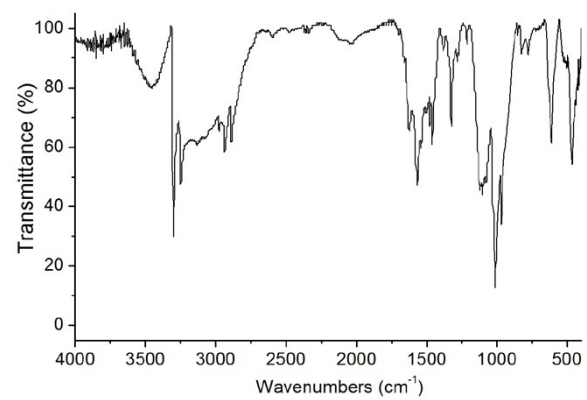

**Fig. S2** IR spectrum of compound **2**.

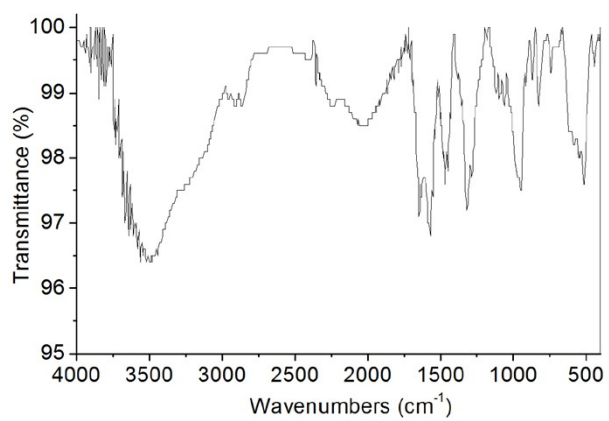

**Fig. S3** IR spectrum of compound **3**.

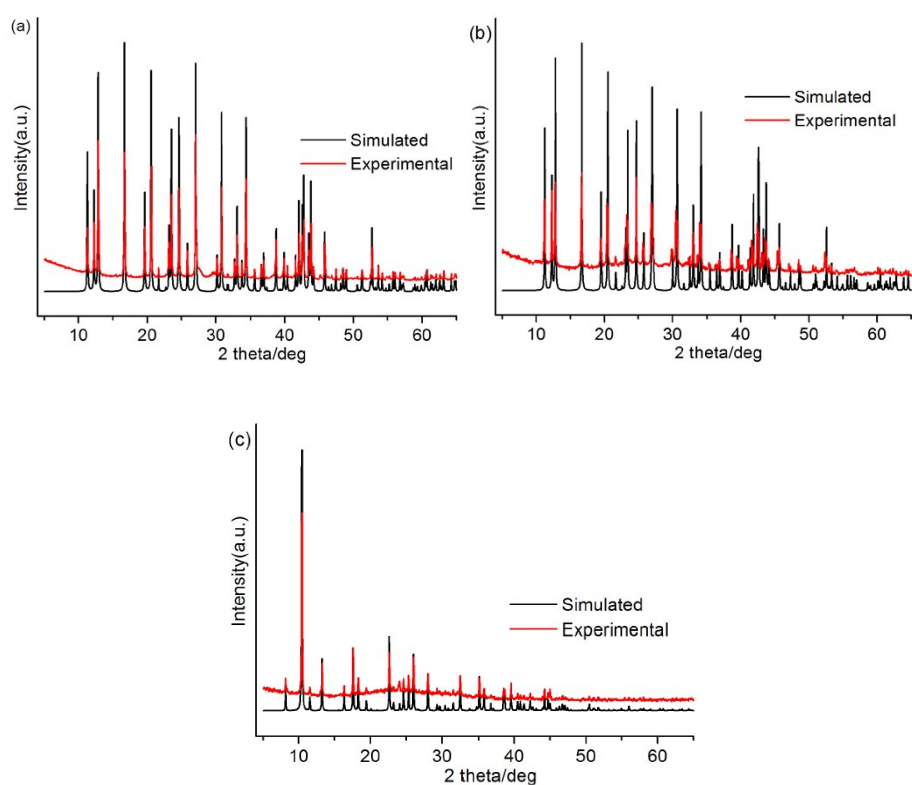

**Fig. S4** Simulated and experimental powder XRD patterns of compound **1** (a), **2** (b) and **3** (c).

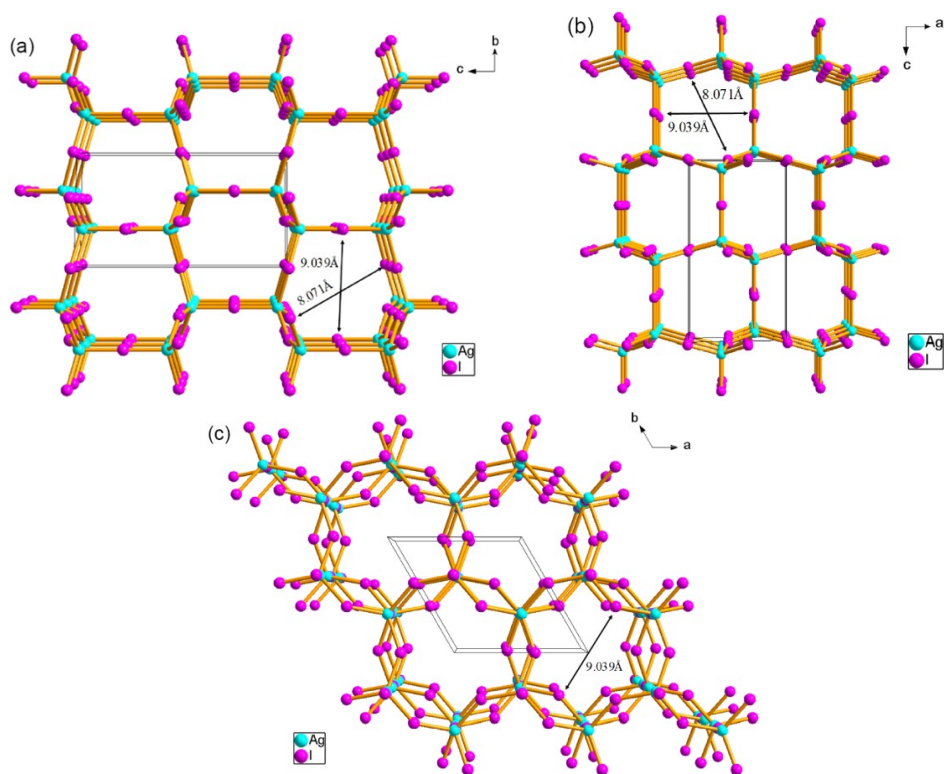

**Fig. S5** Packing diagrams of **1** viewed along the *a* axis (a), *b* axis (b) and *c* axis (c), showing cross-section size of the channels.  $[\text{Co}(\text{en})_3]^{2+}$  cations are omitted for clarity.



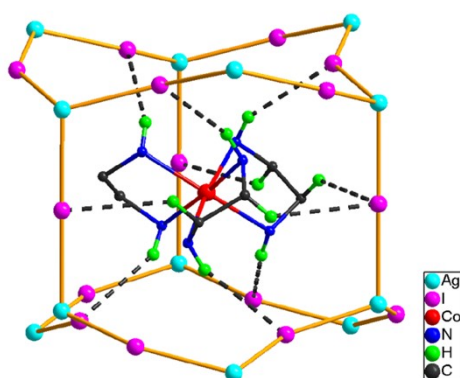

**Fig. S6** A view of N–H···I and N–H···I H-bonding interaction between  $[\text{Co}(\text{en})_3]^{2+}$  and  $\alpha\text{-}[\text{Ag}_2\text{I}_4]_n^{2n-}$  framework in **1**.

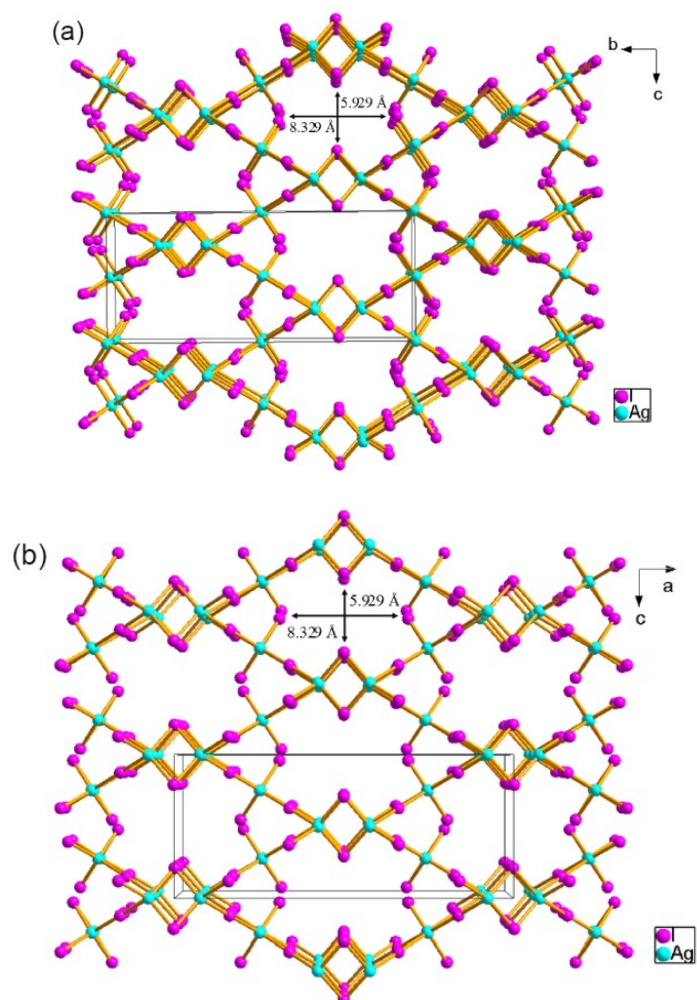

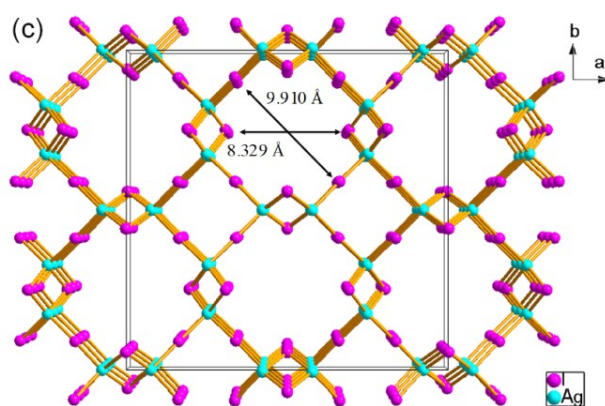

**Fig. S7** Packing diagrams of **3** viewed along the *a* axis (a), *b* axis (b) and *c* axis (c), showing cross-section size of the channels.  $[\text{Co}(\text{dien})_2]^{2+}$  cations are omitted for clarity.

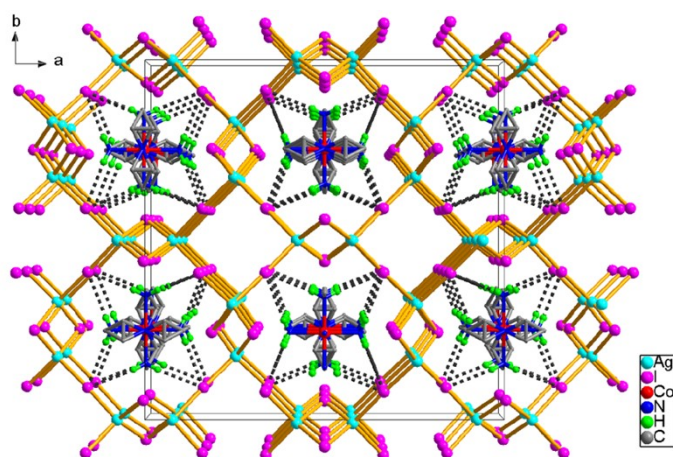

**Fig. S8** A packing diagram of **3** viewed along the *c* axis, showing  $\text{N}-\text{H}\cdots\text{I}$  H-bonding interactions between  $[\text{Co}(\text{dien})_2]^{2+}$  cation and  $\beta\text{-}[\text{Ag}_2\text{I}_4]_n^{2n-}$  framework.  $\text{H}_2\text{O}$  molecules are omitted for clarity.

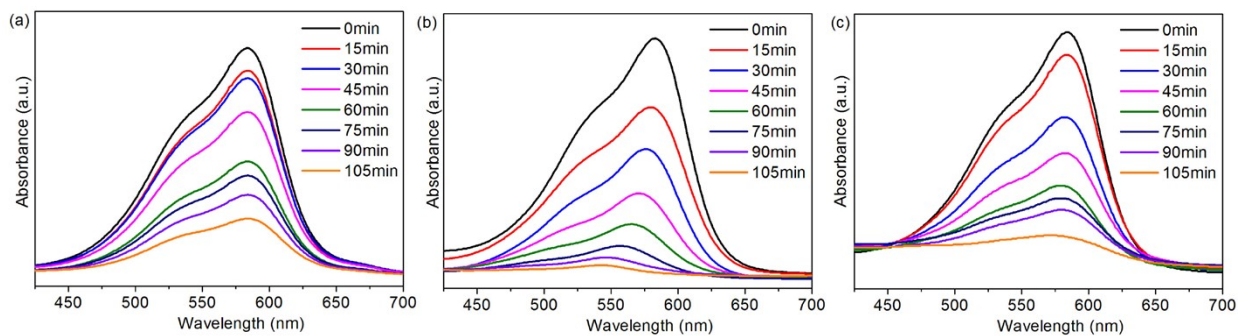

**Fig. S9.** Time dependent absorption spectra of CV solutions with photodegradation over compounds **1** (a), **2** (b) and **3** (c).

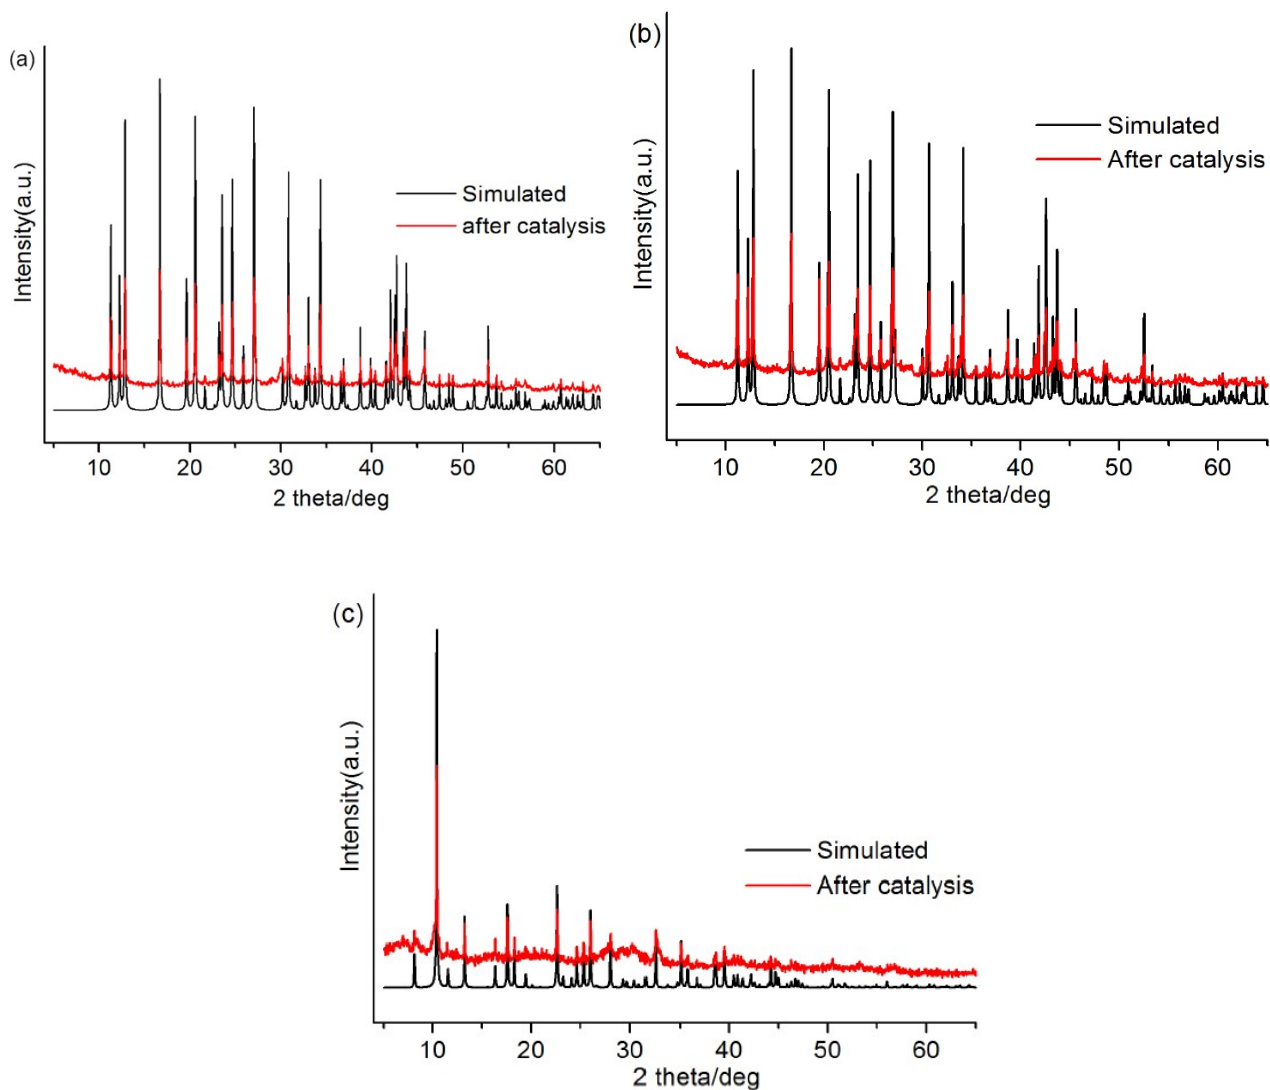

**Fig. S10.** Simulated PXRD patterns and experimental PXRD patterns after photocatalysis for compounds **1** (a), **2** (b) and **3** (c)

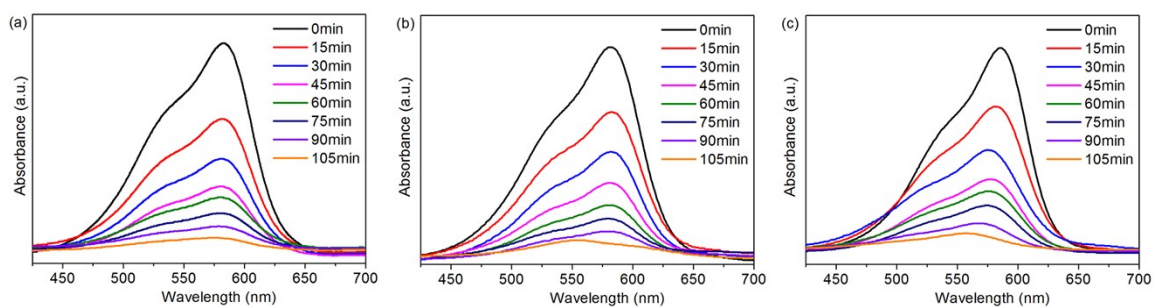

**Fig. S11** Time dependent absorption spectra of CV solutions with photodegradation catalyzed by compound **2** in cycle 1 (a), cycle 2 (b) and cycle 3 (c).

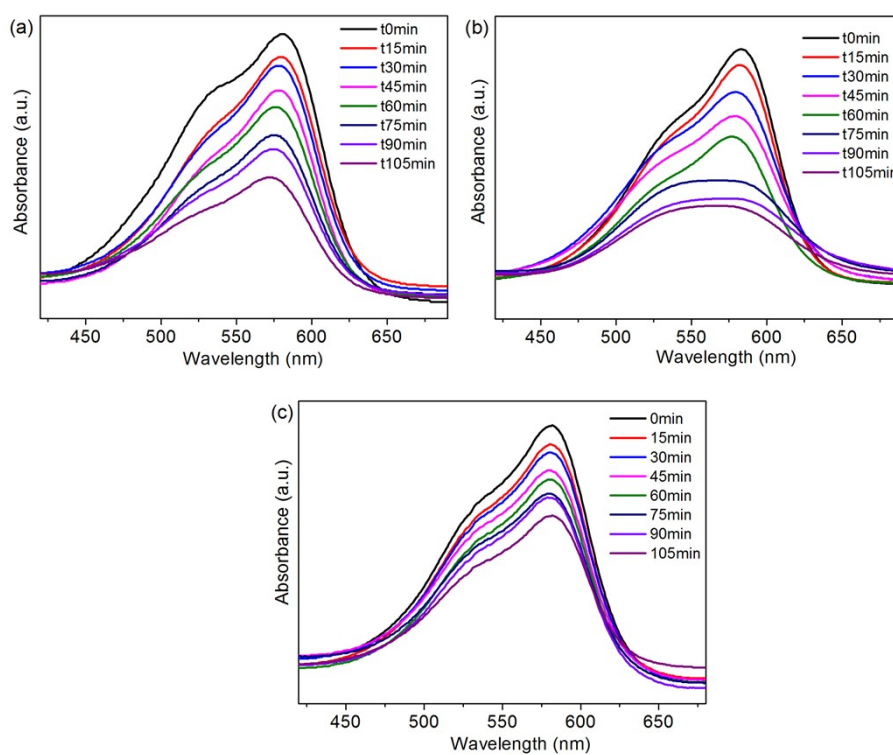

**Fig. S12** Time dependent absorption spectra of CV solution with photodegradation catalyzed by compound **1** in the presence of radical quenching agents AO (a), BQ (b), and TBA (c).

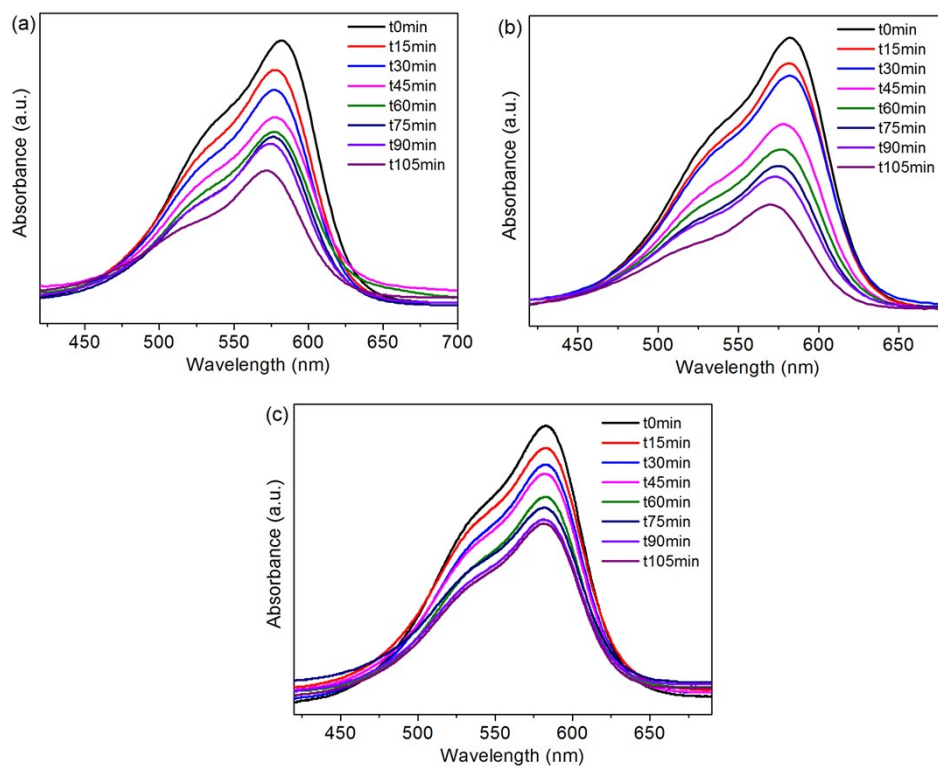

**Fig. S13** Time dependent absorption spectra of CV solution with photodegradation catalyzed by compound **2** in the presence of radical quenching agents AO (a), BQ (b), and TBA (c).

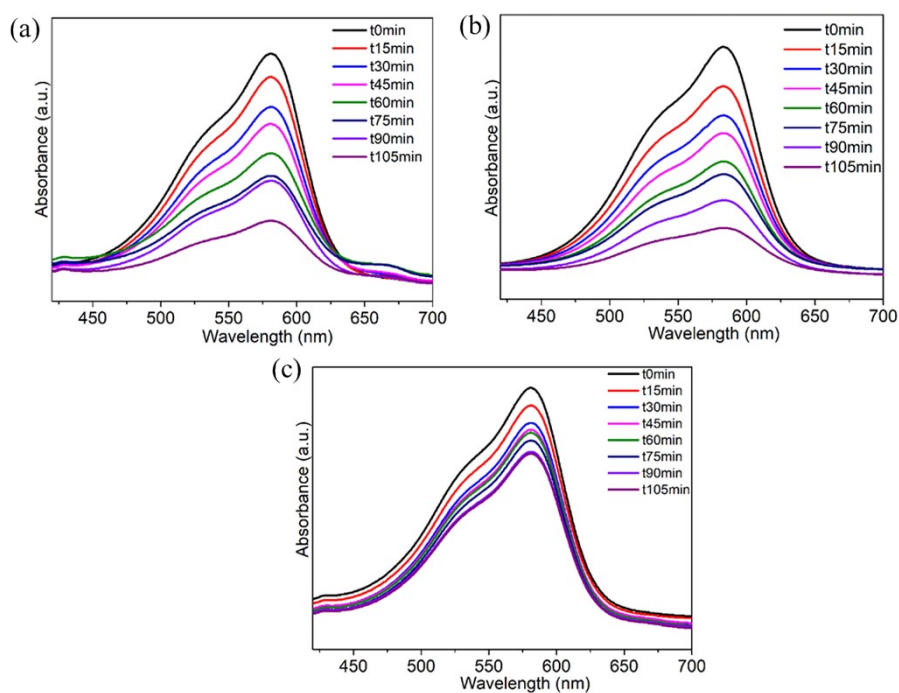

**Fig. S14** Time dependent absorption spectra of CV solution with photodegradation catalyzed by compound **3** in the presence of radical quenching agents AO (a), BQ (b), and TBA (c).

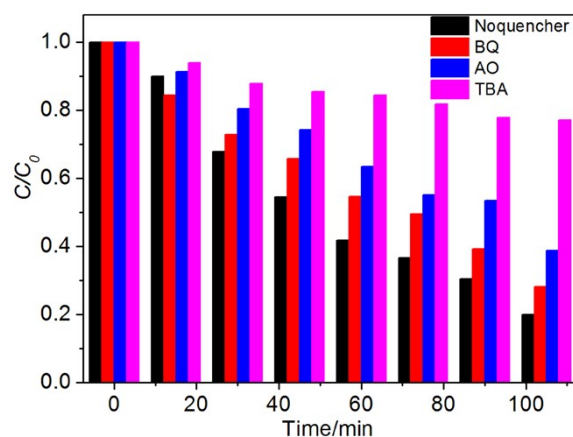

**Fig. S15** Catalytic activities for photodegradation of CV over compound **3** in the presence of quenchers BQ, TBA and AO.

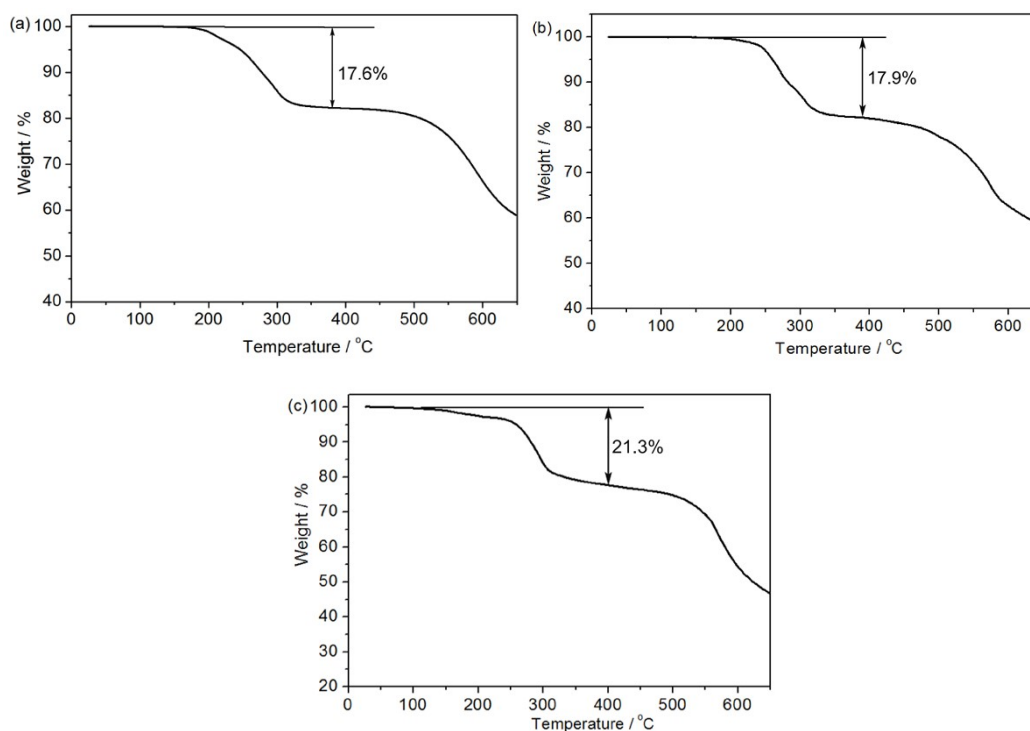

**Fig. S16** Thermal gravimetric curves of compounds **1** (a), **2** (b), and **3** (c).

Thermal stabilities of compounds **1–3** were investigated using thermogravimetric analysis (TGA) method under a nitrogen atmosphere (Fig. S16). TGA curve shows that compound **1** has a mass loss of 17.6% between 190 and 400 °C, which is consistent with the theoretical mass loss of three en molecules (theoretical value: 18.7%). Compound **2** exhibits a similar decomposition process with a mass loss of 17.9 % between 180 °C and 400 °C (theoretical value: 18.8 % for 3 en). The total mass loss of 21.3 % in 110-400 °C of compound **3** is attributed to the loss of a H<sub>2</sub>O and two dien molecules (theoretical value: 22.3%).
